# Supplementary material for: Monetary value of time walking for open defecation: a discrete choice experiment in rural Malawi
Source: Research Square preprint supplement (doi:10.21203/rs.3.rs-6031035/v1), 2025-02-18
Supplement: Supplementary file 1 [file 3094be90bc16f30d35de16d0.docx]

# Supplementary materials

**Contents**

1. DIRECT checklist (Ride et al., 2024)
2. Warm-up task
3. Additional design considerations and amendments during piloting
4. Choice tasks
5. Full model output (all excluding dummy task failers and speeders)
6. Sub-group analysis by weather (all excluding dummy task failers and speeders)
7. Primary analysis including dummy task failers and speeders
8. Latent class analysis

# A. DIRECT checklist (Ride et al., 2024)

| **Item** |  | **Page /para** |
| --- | --- | --- |
| Purpose and rationale | |  |
| 1 | Describe the real-world context and decision-maker that the hypothetical choice context seeks to replicate or inform | Supp. Mat. C |
| 2 | Provide a rationale for using a DCE to answer the research question | Introduction |
| Attributes and levels | |  |
| 3 | Describe how attributes and levels were derived (e.g. literature review, interviews, focus groups, expert input) | Methods: Choice task development and piloting |
| 4 | Provide the final list of attributes and levels | Methods: Choice task development and piloting |
| Experimental design | |  |
| 5 | Report the number of alternatives per choice set and whether they were labelled or unlabelled | Methods: DCE design |
| 6 | Describe response options (e.g. forced choice, opt-out, status quo) | Supp. Mat. D: Opt-out and block randomisation |
| 7 | Describe the type of experimental design (e.g. orthogonal, D-efficient, Bayesian efficient, partial profile) | Methods: DCE design |
| 8 | Describe which effects are identified in the design (e.g. main effects, higher order interactions, functional form) | Methods: data analysis |
| 9 | Describe the number of choice sets, blocks and choice sets per block | Methods: DCE design |
| 10 | Indicate how the experimental design was obtained (software, catalogue, other) | Methods: DCE design |
| Survey design | |  |
| 11 | Provide a sample choice set and the instructions and background information given to respondents (e.g. providing the survey as an appendix) | Figure 1. Methods: Choice task development and piloting |
| 12 | Report any randomisation (e.g. choice set order, attribute order, alternative order, framing effects) | Supp. Mat. D: opt-out and block randomisation |
| 13 | Describe what was checked in piloting (e.g. understanding, respondent burden, timing, wording) | Supp. Mat. C |
| 14 | Report whether information from the pilot was used to update the experimental design (e.g. priors, functional form of attributes) or survey design | Supp. Mat. C |
| Sample and data collection | |  |
| 15 | Report respondent inclusion/exclusion criteria | Methods: Sampling and data collection |
| 16 | Describe how data were collected (e.g. mail, personal interview, web survey) | Methods: Sampling and data collection |
| 17 | Report the response rate or cooperation rate, if possible | Supp. Mat. D: Additional information about sampling |
| 18 | Report the final sample size and how the sample size was determined | Methods: Sampling and data collection |
| 19 | Describe respondent characteristics and representativeness of target population, if known | Table 1.  Supp Mat. D.: Additional information about sampling |
| Econometric analysis | |  |
| 20 | Indicate coding of data (e.g. effects, dummy, continuous) including definitions | Supp Mat. D.: Additional detail regarding analysis |
| 21 | Report whether any respondents were removed and why (e.g. suspected fraudulent responses, rationality tests) | Methods: Quality Control  Results: Sample characteristics |
| 22 | Provide the rationale for model choice (e.g. conditional logit, mixed logit, latent class) and assumptions (e.g. error variance) | Methods: Data Analysis |
| 23 | Report model specification | Methods: Data Analysis  Code provided. |
| Reporting of results | |  |
| 24 | Report the model performance, goodness of fit (if comparing models) | Supp. Mat. E |
| 25 | Describe methods used for analysis of model results (e.g. calculation of marginal rate of substitution, attribute relative importance, welfare gain) | Methods: Data Analysis |
| 26 | Report measures of precision for the output(s) of interest (e.g. confidence intervals) and how these were derived | Results: Main DCE results   Methods: Data Analysis |

# B. Warm-up task

To help people understand basic principles, we first included a warm-up task involving two food menus and a question of which was “better” if the price was the same.

# C. Additional design considerations and findings from piloting

The real-world context that the hypothetical choice context seeks to inform is how people value their travel time for OD, for the purpose of non-market valuation in benefit-cost analysis. The two rounds of piloting sought to understand whether the tasks were acceptable to participants, whether the payment vehicle was credible, how long completing 8 tasks might take, and what the best levels of the payment attribute might be.

#### Levels of payment attribute in piloting

In the original pilot, the payment attribute had 6 levels: 0, 10, 20, 50, 100, 200 (in Malawian Kwacha, MWK). These were worth approximately US$ 0, 0.006, 0.012, 0.03, 0.06, 0.12 (December 2023 exchange rate: 1,680). At 3,000 MWK, 50% of the wage for 10 minutes work would be worth about 42 MWK. The nearest commonly-used note is 50 MWK, so we chose the two denominations below this (10 and 20) and the two above (100 and 200). It was important to allow for values both above and below the hypothesised amount, as we did not know how participants would respond to the tasks. In addition, during piloting rounds 1 and 2 we had included a third attribute which described whether the participant was walking for OD alone or with a friend / family member.

#### Changes made as a result of piloting

Four changes were made as a result of piloting. First, the attribute for walking alone versus accompanied was dropped as it was causing unnecessary confusion, and did not seem important to participants once they understood what it was. Second, the values of the payment attribute were increased to 0, 20, 50, 100, 200, and 300. The rationale for this was that the 10 MWK coin has fallen out of wide use since it is so small in value, and it was confusing people. For context, 10 MWK would buy only ~15g of maize, or <20% of a portion of porridge. Since most people were not used to 10 MWK coins, we changed the payment points to 0, 20, 50, 100, 200, 300. This left open the option of dropping choice tasks including 200 and 300 MWK payments. Third, we adjusted the menu warm-up so it aligned to the final DCE tasks (i.e. 1 item common to both options, alongside 2 variable attributes). Fourth, from the first round of piloting, we had abandoned the idea of using payments in-kind as volumes of maize, as it was a less credible payment vehicle to participants.

#### Attribute visualisation

Payments were visualised with images of notes and the written number. We retained 4 levels for additional walking time in minutes: 0, 10, 20, 30, which are visualised as a clock with the additional number of minutes shown. The two attribute levels were presented in yellow or blue background to emphasise what the two options were. “Rainy” and “sunny” are the two main experienced characteristics of daytime weather in Malawi, and are effectively mutually exclusive. The framing was explained as the weather at the time of walking, not the season in general.

# D. Additional sampling and analysis considerations

#### Opt-out and block randomisation

There was no opt-out because because defecation is not optional - 80% of the tasks were framed as a comparison between no payment and no additional walking (status quo) versus being paid to walk further. In the other 20%, the task involved trading off two different >0 payments with two different travel times. We did not add a status quo option to these tasks because it risked confusing participants, while acknowledging that this could slightly upwardly bias WTA estimates for people who would reject walking further at almost any price. To avoid bias from task ordering (e.g. less care taken over later tasks) we randomised participants into 10 groups, with half of participants in block 1 doing the block 1 tasks in reverse order (Nguyen et al., 2021).

#### Additional information about sampling

With OD prevalence at only 6% in TA Nkalo, it proved challenging to identify eligible participants during piloting. We therefore worked with health surveillance assistants (HSAs), a cadre of community-based healthcare workers who know people in their catchment area well. HSAs were already part of W4E implementation, and they were asked to pre-identify households that did not have a sanitation facility and were likely to practice OD. In some villages we were not able to identify a sufficient number of participants who had practised OD in the past 7 days. Therefore, to meet our target sample size we had to visit 36 villages instead of 30. Of the participants surveyed, 287 had complete DCE data and so proceeded to analysis. Given the challenges in identifying people who practised OD, the sample was not stratified by gender, and participant selection based on who was available and willing to be interviewed. The response rate was 100% amongst eligible respondents. With the sample originating from only one sub-district in Malawi, the cannot be considered representative of people practising OD nationally, but should provide a good indication of the Chiradzulu district since participants came from 36 different villages.

#### Additional information about quality control

We included timestamps throughout the survey, which allowed calculation of the time taken for the DCE section. In our primary analysis, we excluded people that took <8 seconds per task on average (“speeders”). That is, <100 seconds to complete both (i) the explanation of task 1 (~30 seconds), and (ii) the 9 tasks (8 + dummy). We cross-verified enumerator notes at the end of identified speeder interviews, and almost all had been flagged as not taking the DCE tasks seriously. We included speeders in a sensitivity analysis.

#### Additional detail regarding analysis

Observations are each of the two options on the choice card, the dependent variable is binary indicating whether that option was chosen or not, and the covariates are the attributes as continuous variables. Observations were grouped by choice set, i.e. a unique ID for each pair of options, with standard errors clustered at the participant level. Since options were unlabelled we didn’t include an alternative-specific constant (ASC), but we did test models including ASC as a sensitivity analysis. We based model selection on: (i) evidence of preference/scale heterogeneity – if present, mixed logit preferred; (ii) Akaike/Bayesian information criteria (AIC/BIC) – lower preferred. AIC/BIC cannot be compared between the models including different numbers of observations.

#### Attribute level interpretation

| **walk** |  |  | **payment** |  |  | **weather** |  |
| --- | --- | --- | --- | --- | --- | --- | --- |
| 1 | 0 mins |  | 1 | 0 MWK |  | 1 | rainy |
| 2 | 10 mins |  | 2 | 20 MWK |  | 2 | sunny |
| 3 | 20 mins |  | 3 | 50 MWK |  |  |  |
| 4 | 30 mins |  | 4 | 100 MWK |  |  |  |
|  |  |  | 5 | 200 MWK |  |  |  |
|  |  |  | 6 | 300 MWK |  |  |  |

#### Choice task lists

# E. Full model output (all excluding dummy task failers and speeders)

#### Comparison of conditional logit and mixed logit models

|  | **Primary analysis: choices offering ≤100** | | | | **Sensitivity analysis: choices offering ≤200** | | | | **Sensitivity analysis: choices offering ≤300 (all choices)** | | | |
| --- | --- | --- | --- | --- | --- | --- | --- | --- | --- | --- | --- | --- |
|  | **1 - Conditional logit** | | **2 - Mixed logit** | | **3 - Conditional logit** | | **4 - Mixed logit** | | **5 - Conditional logit** | | **6 - Mixed logit** | |
|  | Coeff. | SE | Coeff. | SE | Coeff. | SE | Coeff. | SE | Coeff. | SE | Coeff. | SE |
| Travel time | -0.0361*** | (0.0062) | -0.0584*** | (0.0107) | -0.0313*** | (0.0048) | -0.0510*** | (0.0080) | -0.0288*** | (0.0045) | -0.0489*** | (0.0083) |
| Payment | 0.0044** | (0.0018) | 0.0059* | (0.0030) | 0.0022*** | (0.0008) | 0.0030** | (0.0015) | 0.0016*** | (0.0006) | 0.0028 | (0.0019) |
| SD (Travel time) |  |  | 0.0537*** | (0.0159) |  |  | 0.0479*** | (0.0119) |  |  | 0.0515*** | (0.0117) |
| SD (Payment) |  |  | 0.0197*** | (0.0057) |  |  | 0.0132*** | (0.0029) |  |  | 0.0133*** | (0.0025) |
| Number of choice sets | 785 | | 785 | | 1,074 | | 1,074 | | 1,340 | | 1,340 | |
| Number of participants | 168 | | 168 | | 168 | | 168 | | 168 | | 168 | |
| Choices included per participant | 4.7 | | 4.7 | | 6.4 | | 6.4 | | 8.0 | | 8.0 | |
| Log likelihood | -519 | | -463 | | -717 | | -606 | | -901 | | -721 | |
| AIC | 1,042 | | 936 | | 1,438 | | 1,221 | | 1,806 | | 1,453 | |
| BIC | 1,053 | | 962 | | 1,450 | | 1,250 | | 1,817 | | 1,482 | |
| Marginal WTA for an additional minute of travel time (MWK) | 8.2 (3.5 - 12.9) | | 10 (1 - 18.9) | | 14 (6.8 - 21.2) | | 17 (-0.4 - 34.4) | | 18.3 (9.4 - 27.1) | | 17.5 (-7.7 - 42.7) | |

#### Comparison of mixed logit models with and without alternative-specific constant (ASC)

|  | **Choices offering ≤100** | | | |
| --- | --- | --- | --- | --- |
|  | **1 - Mixed logit excl ASC. (main model)** | | **2 - Mixed logit incl. ASC** | |
|  | Coeff. | SE | Coeff. | SE |
| Travel time | -0.0584*** | (0.0107) | -0.0390*** | (0.0069) |
| Payment | 0.0044** | (0.0030) | 0.0050** | (0.0020) |
| ASC |  |  | -0.0745 | (0.0813) |
| Number of choice sets | 785 | | 785 | |
| Number of participants | 168 | | 168 | |
| Choices included per participant | 5 | | 5 | |
| Log likelihood | -463 | | -518 | |
| AIC | 936 | | 1,044 | |
| BIC | 962 | | 1,065 | |
| Marginal WTA for an additional minute of travel time (MWK) | 10 (1 - 18.9) | | 7.8 (2.8 - 12.9) | |

# F. Sub-group analysis by weather (all excluding dummy task failers and speeders)

|  | Rainy | | | | Sunny | | | |
| --- | --- | --- | --- | --- | --- | --- | --- | --- |
|  | 1 - Conditional logit | | 2 - Mixed logit | | 3 - Conditional logit | | 4 - Mixed logit | |
|  | Coeff. | SE | Coeff. | SE | Coeff. | SE | Coeff. | SE |
| Travel time | -0.0381*** | (0.0089) | -0.0722*** | (0.0197) | -0.0346*** | (0.0089) | -0.0476*** | (0.0150) |
| Payment | 0.0035 | (0.0025) | 0.0060 | (0.0039) | 0.0054** | (0.0026) | 0.0062 | (0.0052) |
| SD (Travel time) |  |  | 0.0934*** | (0.033) |  |  | 0.0333 | (0.033) |
| SD (Payment) |  |  | 0.01 | (0.012) |  |  | 0.0344*** | (0.012) |
| Number of choices | 766 | | 766 | | 804 | | 804 | |
| Number of participants | 168 | | 168 | | 168 | | 168 | |
| Log likelihood | -249 | | -231 | | -269 | | -248 | |
| AIC | 503 | | 471 | | 542 | | 507 | |
| BIC | 512 | | 495 | | 551 | | 530 | |
| Marginal WTA for an additional minute of travel time (MWK) | 11 (-0.9 - 22.9) | | 12 (0 - 24.1) | | 6.4 (2.5 - 10.3) | | 7.7 (-2.9 - 18.2) | |

# G. Primary analysis including dummy task failers and speeders

|  | **Sensitivity analysis (all participants):  choices offering ≤100** | | **Sensitivity analysis (all participants): choices offering ≤200** | | **Sensitivity analysis (all participants): choices offering ≤300** | |
| --- | --- | --- | --- | --- | --- | --- |
|  | Coeff. | SE | Coeff. | SE | Coeff. | SE |
| Travel time | -0.0290*** | (0.0078) | -0.0176*** | (0.0065) | -0.0164** | (0.0064) |
| Payment | 0.0127*** | (0.0025) | 0.0073*** | (0.0013) | 0.0070*** | (0.0013) |
| SD (Travel time) | 0.0654*** | (0.0153) | 0.0686*** | (0.0111) | 0.0695*** | (0.0113) |
| SD (Payment) | 0.0212*** | (0.0039) | 0.0123*** | (0.0024) | 0.013*** | (0.0019) |
| Choice sets (n) | 1,320 | | 1,828 | | 2,291 | |
| Participants (n) | 287 | | 287 | | 287 | |
| Marginal WTA for 1 minute (MWK) | 2.3 (1.1 - 3.4), (p=0.0001) | | 2.4 (0.5 - 4.3), (p=0.012) | | 2.3 (0.4 - 4.2), (p=0.018) | |

# H. Latent class analysis

The optimal number of classes was 3

- With 2 classes, BIC = 1513.4
- With 3 classes, BIC = 1480.5
- With 4 classes, BIC = 1488.8
- With 5 classes, BIC = 1501.7

Regression output for latent class analysis

|  | Class 1 | Class 2 | Class 3 |
| --- | --- | --- | --- |
| Travel time | -0.0366*** | -0.1370*** | -0.0011 |
| (0.0104) | (0.0461) | (0.0102) |
| Payment | 0.0018 | -0.0099* | 0.0147*** |
| (0.0016) | (0.0058) | (0.0036) |
| Class Share | 37% | 31% | 32% |
